# Supplementary material for: Can virtual reality improve cisgender-transgender relations? Embodied interactions in perspective taking and intergroup contact
Source: Research Square preprint supplement (doi:10.21203/rs.3.rs-6333739/v1), 2025-05-06
Supplement: Supplementary file 1 [file e979f51299cc4233d5980dac.docx]

**Supplementary Material A**

**Avatar Profiles**

***Transgender-Embodied Woman***

**
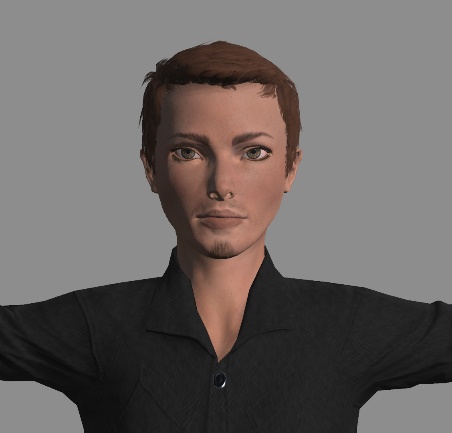
**

You will be playing the role of Alex today. You graduated from university and then worked in the information technology field as a programmer for five years before seeking new employment. You identify as a *transgender man* and have a *masculine* appearance. Your pronouns are *he/him*. According to your previous supervisor at Research Technology Labs, you have demonstrated a great degree of technical knowledge but have been passed over for regular promotions, mostly due to your lack of managerial skills.

***Transgender-Embodied Man***

**
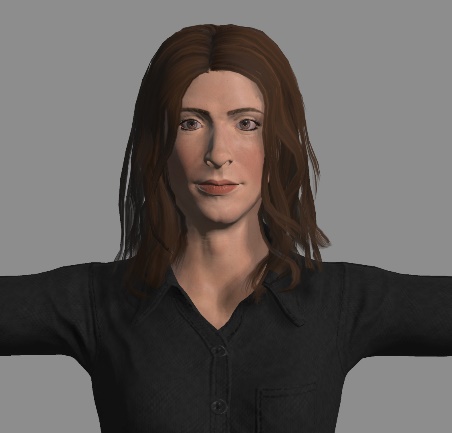
**

You will be playing the role of Alex today. You graduated from university and then worked in the information technology field as a programmer for five years before seeking new employment. You identify as a *transgender woman* and have a *feminine* appearance. Your pronouns are *she/her*. According to your previous supervisor at Research Technology Labs, you have demonstrated a great degree of technical knowledge but have been passed over for regular promotions, mostly due to your lack of managerial skills.

***Cisgender-Embodied Woman***

**
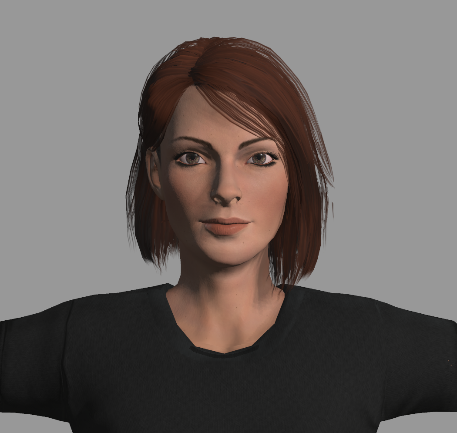
**

You will be playing the role of Alex today. You graduated from university and then worked in the information technology field as a programmer for five years before seeking new employment. You identify as a *cisgender woman* and have a *feminine* appearance. Your pronouns are *she/her*. According to your previous supervisor at Research Technology Labs, you have demonstrated a great degree of technical knowledge but have been passed over for regular promotions, mostly due to your lack of managerial skills.

***Cisgender-Embodied Man***


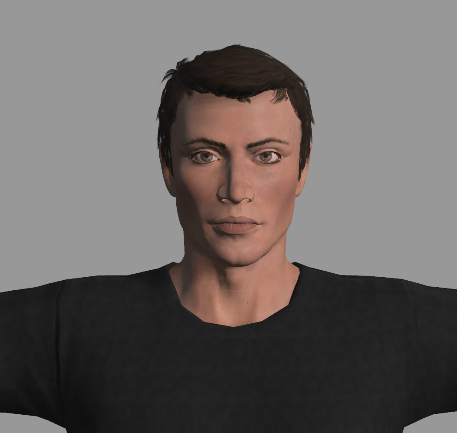


You will be playing the role of Alex today. You graduated from university and then worked in the information technology field as a programmer for five years before seeking new employment. You identify as a *cisgender man* and have a *masculine* appearance. Your pronouns are *he/him*. According to your previous supervisor at Research Technology Labs, you have demonstrated a great degree of technical knowledge but have been passed over for regular promotions, mostly due to your lack of managerial skills.

*Note.* Avatar profile descriptions were adapted from Dray et al. (2020).

Dray, K. K., Smith, V. R. E., Kostecki, T. P., Sabat, I. E., & Thomson, C. R. (2020). Moving beyond the gender binary: Examining workplace perceptions of nonbinary and transgender employees. *Gender, Work & Organization*, 1-11. <https://doi.org/10.1111/gwao.12455>

**Supplementary Material B**

**Interview Questions and Disclosure**

The simulated interview task was administered twice in the experiment. Thus, two question sets were created using an item from each of three topic areas (diversity, equity, inclusion; allyship; gender identity), and question set presentation was counterbalanced across participants.

**{QUESTION SET A}**

QSA1: Please share with me what the terms diversity, equity, and inclusion mean to you?

QSA2: Do you think that workplace policies should include statements on allyship, such as how to respond to sexist, racist, or homophobic behaviours? Why or why not?

QSA3: In your opinion, should sharing gender pronouns be incorporated in workplace settings? Why or why not?

**{QUESTION SET B}**

QSB1: In your opinion, what is the most challenging aspect of working in a diverse, equitable, and/or inclusive environment?

QSB2: Allyship refers to members of privileged in-groups making efforts to advance the interests of marginalised groups. Do you think allyship is important in the workplace? Why or why not?

QSB3: Do you think it is important to understand gender diversity? Why or why not?

***DISCLOSURE***

Welcome back to the interview Alex. As you may or may not know, gender-diversity, gender identity and gender expression are becoming more visible in society through for instance, social and traditional media, policy initiatives, and workplace inclusion and diversity strategies. In recognition of this, I wanted to share with you my own experience of being a transgender woman in the workplace before we continue. I too was previously passed over for regular promotions in my previous job. Employers cited insufficient leadership skills as the reason, however, I believe the lack of promotion was at least in part due to my appearance and use of she/her pronouns. I’m grateful to now work here at The Diversity and Inclusion Council where this challenge is no longer present.
